# Supplementary material for: Targeted depletion of PIK3R2 induces regression of lung squamous cell carcinoma
Source: PubMed Central journal article supplement (PMC5356720; doi:10.18632/oncotarget.13195), 2016-11-08
Supplement: oncotarget-07-85063-s001.pdf [file oncotarget-07-85063-s001.pdf]

## Targeted depletion of *PIK3R2* induces regression of lung squamous cell carcinoma

### SUPPLEMENTARY FIGURES AND TABLES

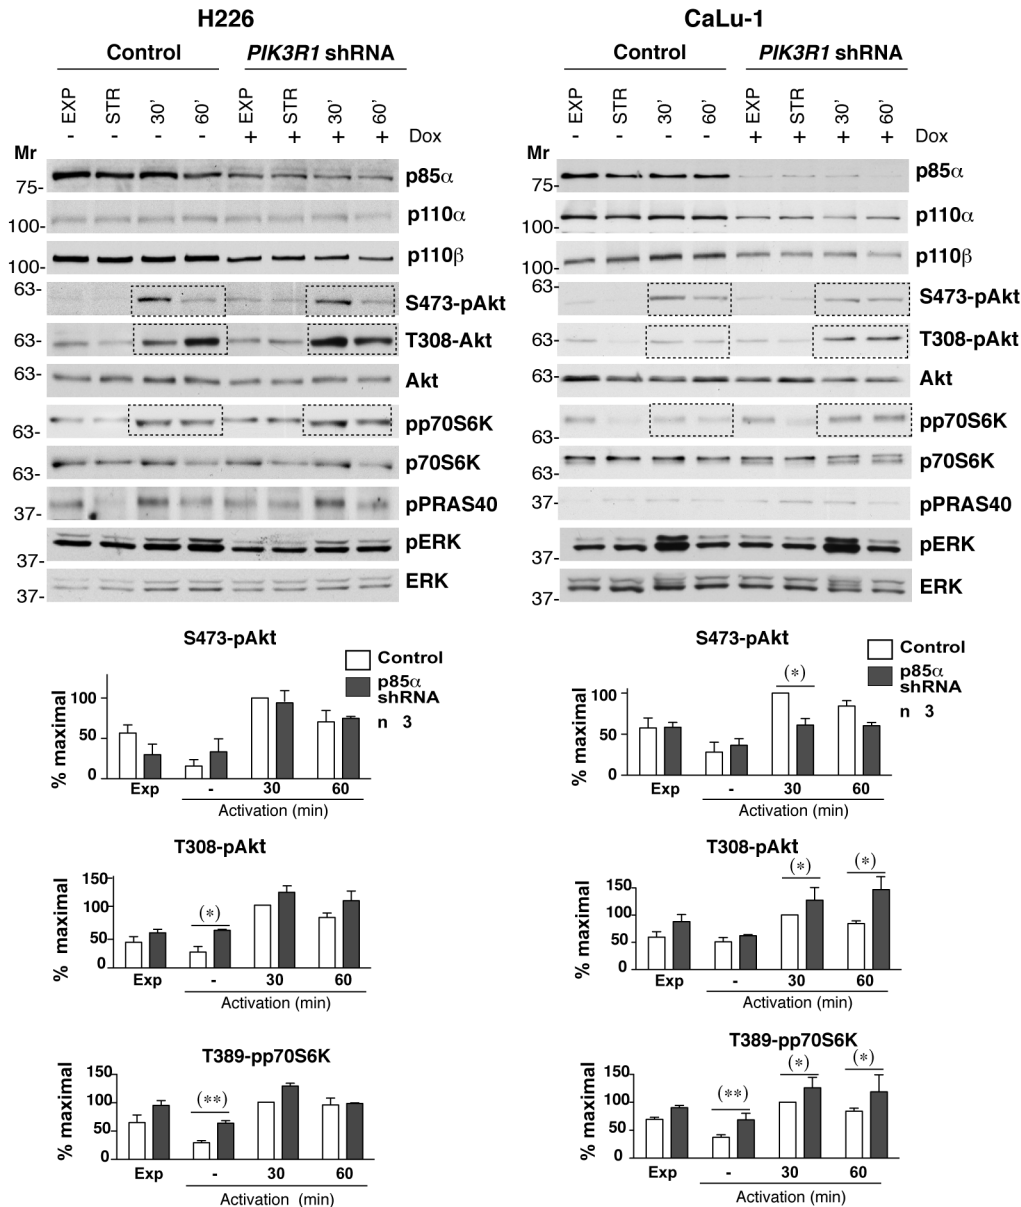

**Supplementary Figure S1: p85 $\alpha$  depletion enhances PI3K pathway activation in CaLu-1 and H226 cell lines.** CaLu-1 or H226 cells expressing inducible *PIK3R1* shRNA were cultured alone or with doxycycline (2  $\mu$ g/ml, 72 h); extracts were analyzed in WB. Graphs show percentage of maximal S472-pAkt, T308-pAkt and T389-pp70S6K signal normalized to total Akt or p70S6K levels and compared to control cell signal at 30 min post-stimulation, considered 100%. \* P < 0.05, \*\* P < 0.01; Student's t test.

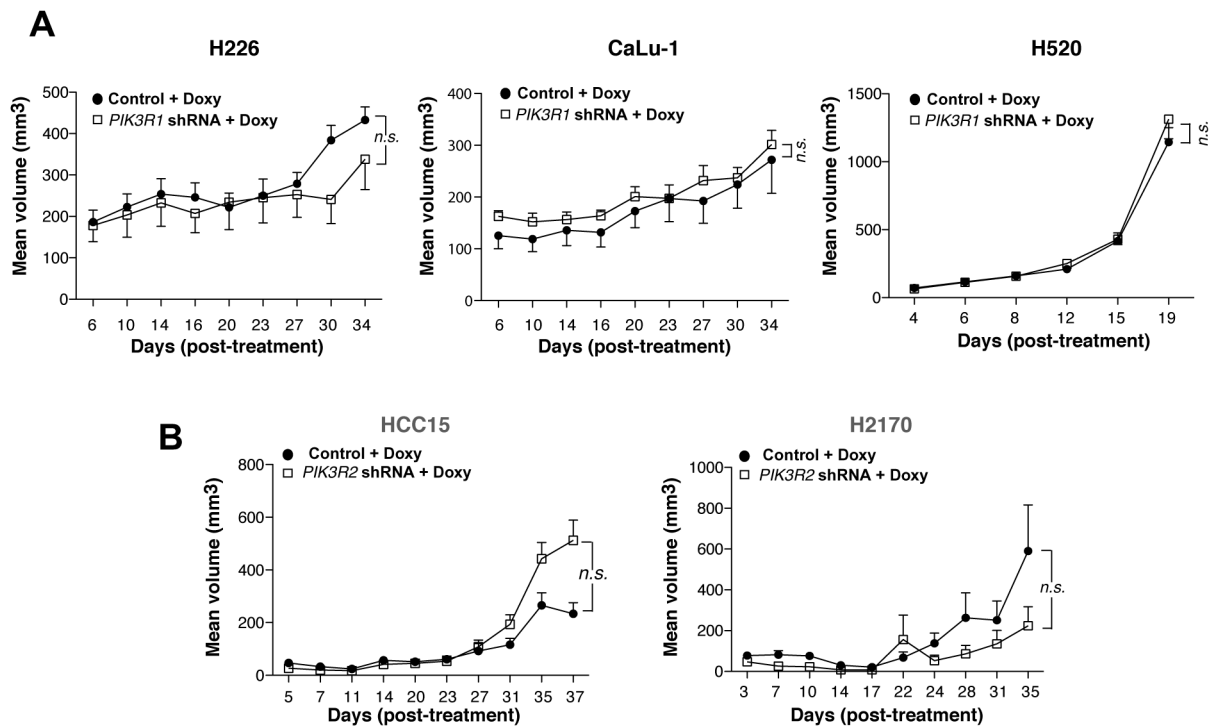

**Supplementary Figure S2: PIK3R1 depletion does not trigger lung SQCC xenograft regression.** **A.** The figure illustrates the response to PIK3R1 depletion of indicated tumor xenografts treated as in main Figure 3A and expressed as mean  $\pm$  SEM size of the control or PIK3R1 shRNA-treated xenografts. **B.** Mean  $\pm$  SEM size of control or PIK3R2 shRNA-treated xenografts as in main Figure 3B. A,B, Differences between control and treated mouse tumors was analyzed using a 2-way ANOVA test; n.s., not significant.

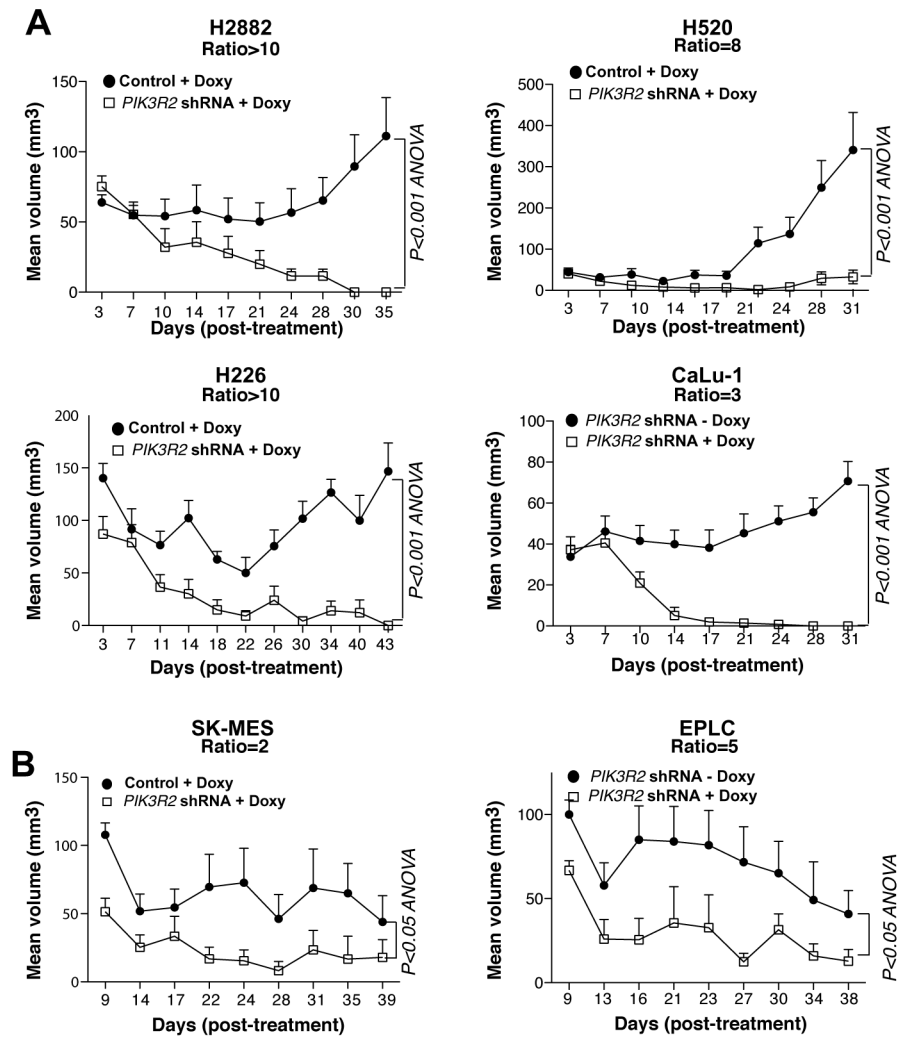

**Supplementary Figure S3: PIK3R2 depletion induces SQCC xenograft regression.** **A.** The figure illustrates the response to PIK3R2 depletion of indicated tumor xenografts treated as in main Figure 4A and expressed as mean ± SEM size of the control or PIK3R2 shRNA-treated xenografts. **B.** Mean ± SEM size of control or PIK3R2 shRNA-treated xenografts as in main Figure 4B. Statistical significance was analyzed using a 2-way ANOVA test.

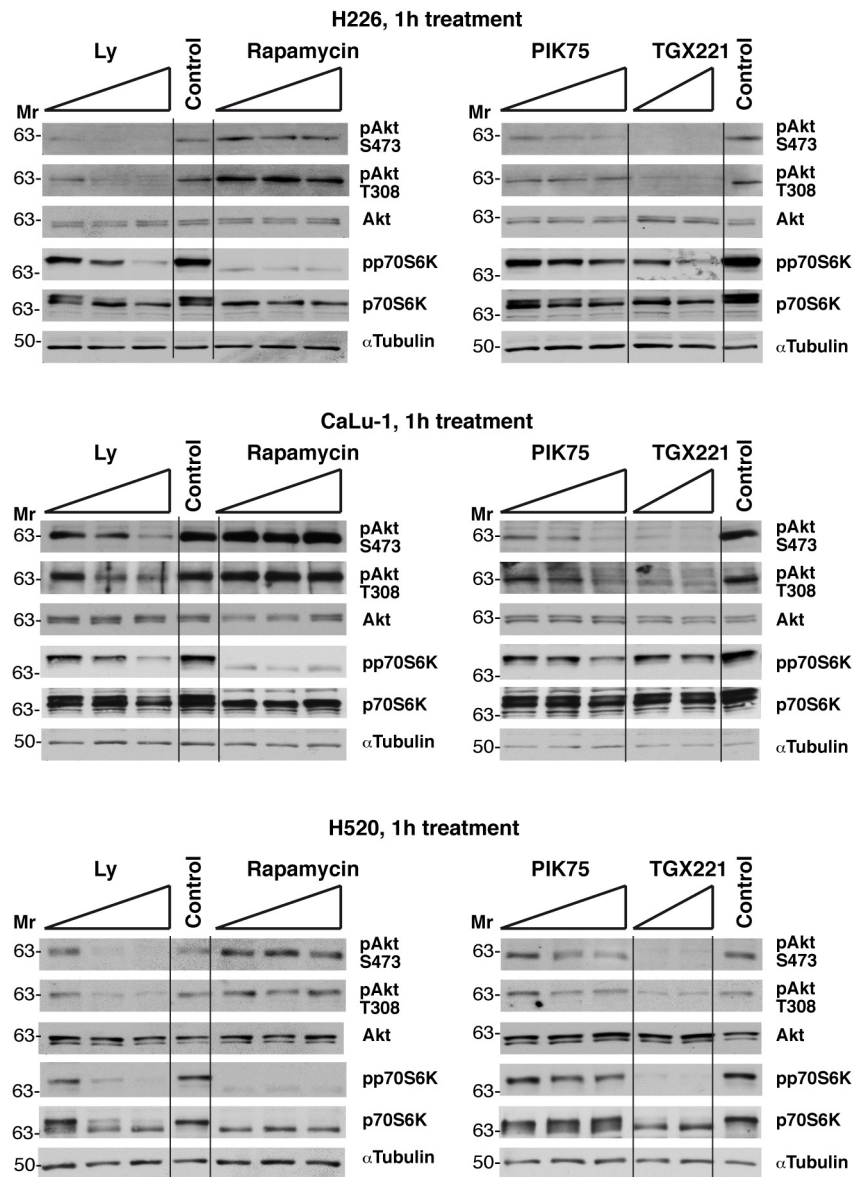

**Supplementary Figure S4: Selective inhibitors for PI3K $\alpha$  or PI3K $\beta$  inhibited PI3K pathway at short times in SQCC cells.** H226, CaLu-1 and H520 cells were cultured in exponential growth with vehicle (DMSO, 1:10<sup>3</sup> V:V) or Ly294002 (1, 5 or 10  $\mu$ M), TGX221 (15 or 30  $\mu$ M), PIK75 (50, 100, or 200 nM), or rapamycin (25, 50, 100 nM) for the last 1 h of culture. Cell extracts were tested in WB with indicated antibodies. Mr indicates relative mobility.

Supplementary Table S1: Summary of tissue culture medium requirements of cell lines used

| Cell line (ATTC/DSMZ reference)      | Medium*          | FBS | Other                                                                                                                                                                                                                                                                                                                                    |
|--------------------------------------|------------------|-----|------------------------------------------------------------------------------------------------------------------------------------------------------------------------------------------------------------------------------------------------------------------------------------------------------------------------------------------|
| CaLu-1 (ATCC HTB-54).                | DMEM             | 10% |                                                                                                                                                                                                                                                                                                                                          |
| SK-MES-1 (ATCC HTB-58).              | EMEM             | 10% |                                                                                                                                                                                                                                                                                                                                          |
| SW900 (ATCC HTB-59)                  | Leibovitz's L-15 | 10% |                                                                                                                                                                                                                                                                                                                                          |
| NCI-H520 [H520] (ATCC HTB-182)       | RPMI 1640        | 10% |                                                                                                                                                                                                                                                                                                                                          |
| NCI-H226 [H226] (ATCC CRL-5826)      | RPMI 1640        | 10% |                                                                                                                                                                                                                                                                                                                                          |
| NCI-H1703 [H1703] (ATCC CRL-5889)    | RPMI 1640        | 10% |                                                                                                                                                                                                                                                                                                                                          |
| NCI-H1869 [H1869] (ATCC CRL-5900)    | DMEM:F-12 (1:1)  | 10% | a) 0.02 mg/ml insulin<br>b) 0.01 mg/ml transferrin<br>c) 25 nM sodium selenite<br>d) 50 nM hydrocortisone<br>e) 1 ng/ml epidermal growth factor (EGF)<br>f) 0.01 mM ethanolamine<br>g) 0.01 mM phosphorylethanolamine<br>h) 100 pM triiodothyronine<br>i) 0.5% (w/v) bovine serum albumin<br>j) 10 mM HEPES<br>k) 0.5 mM sodium pyruvate |
| NCI-H2170 [H2170] (ATCC CRL-5928)    | RPMI 1640        | 10% |                                                                                                                                                                                                                                                                                                                                          |
| NCI-H2882 NCI-H2170 [H22882] (ref26) | RPMI 1640        | 10% |                                                                                                                                                                                                                                                                                                                                          |
| EPLC-272H (ACC 383)                  | RPMI 1640        | 20% |                                                                                                                                                                                                                                                                                                                                          |
| HCC-15 (ACC 496)                     | RPMI 1640        | 10% |                                                                                                                                                                                                                                                                                                                                          |
| BLM (ref 25)                         | DMEM             | 10% |                                                                                                                                                                                                                                                                                                                                          |
| Jurkat                               | RPMI 1640        | 10% |                                                                                                                                                                                                                                                                                                                                          |
| MCF-10A                              | DMEM:F-12 (1:1)  |     | a) 5% horse serum<br>b) 2 mM L-glycine<br>c) 10 µg/ml insulin<br>d) 0.5 µg/ml hydrocortisone<br>e) 20 ng/ml EGF                                                                                                                                                                                                                          |

\* All mediums were supplemented with 2 mM glutamine, 100 IU/mL penicillin and 100 µg/mL streptomycin

**Abbreviations:** DMEM: Dulbecco's modified Eagle's Medium; EMEM: Eagle's Minimum Essential Medium; FBS: fetal bovine serum (heat-inactivated); F-12: Ham's F-12 medium

**Supplementary Table S2: Phenotype of SQCC cell lines studied. (Column 1) the SQCC lines used for the study, (column 2) ratio of p85 $\beta$ /p85 $\alpha$  levels estimated as described (see text), (column 3) Positive (YES) or negative (NO) response of SQCC cell line-derived tumor xenografts to inducible *PIK3R2* shRNA treatment; N.D., not determined; (column 3) mutational status of indicated genes, (column 5) other potentially relevant mutations in these cells. (column 6) Rate of cell division in culture, which was unrelated to efficiency of xenograft establishment. +++, <1 week required for confluence recovery after 1:5 dilution; ++, 1 week to 10 days; +, 10 days to two weeks;  $\pm$ , >2 weeks. (column 7) Relative *PIK3CA*, *CB*, *R1* and *R2* expression; larger font size indicates predominant isoforms**

See Supplementary File 1
